# Supplementary material
Source: publisher figshare collection journal article supplement (https://tandf.figshare.com/ndownloader/files/22395156)
Supplement: Supplementary file 1 [file 22395156]

**Supplemental Material**

**2**

**1**

**Figure A1** Sample HPLC chromatogram of steviol glycoside analysis (1: Rebaudioside A, 2: Stevioside)

| 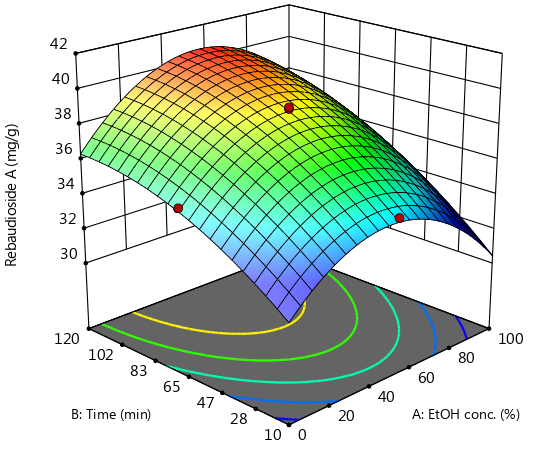 | 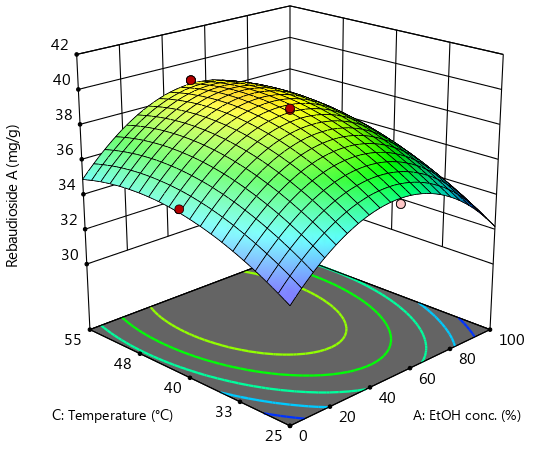 |
| --- | --- |
| 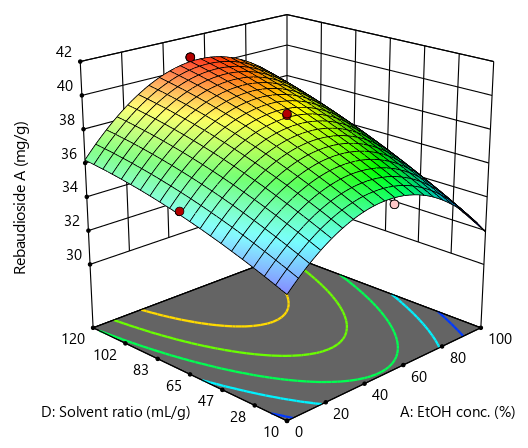 | 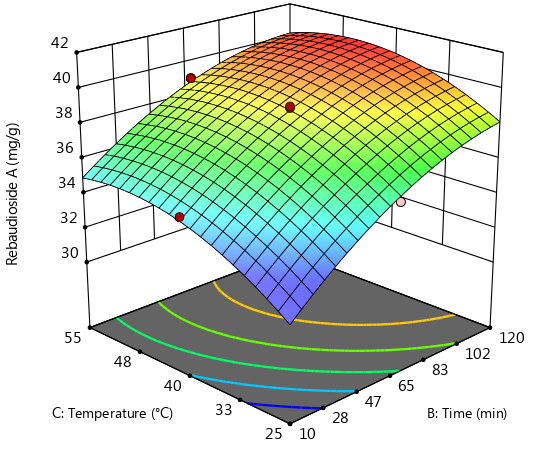 |
| 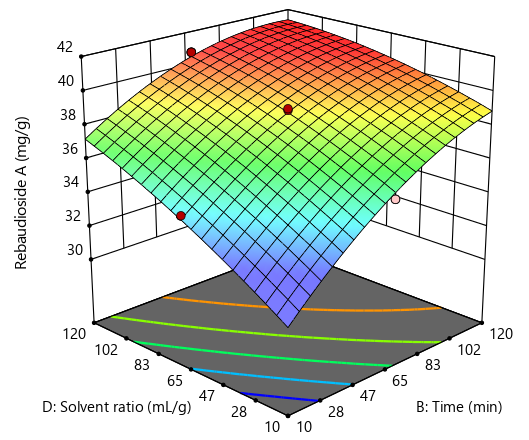 | 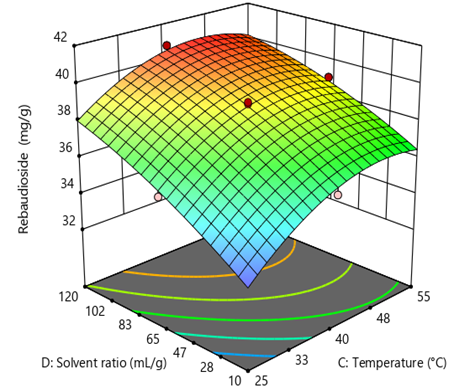 |

**Figure A2** RSMplots of rebaudioside A belonging to maceration (solvent extraction)

| 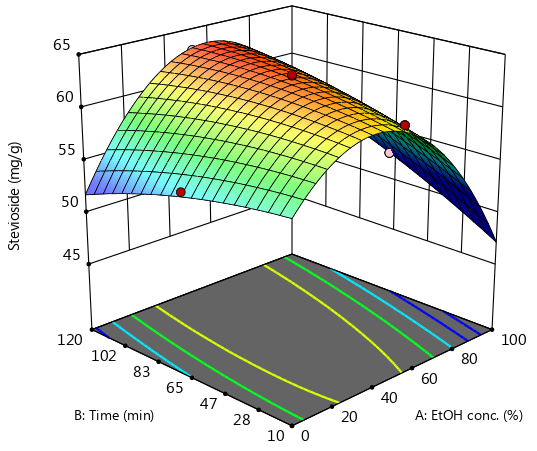 | 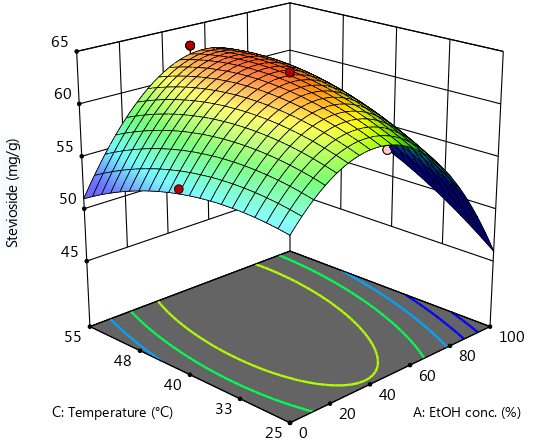 |
| --- | --- |
| 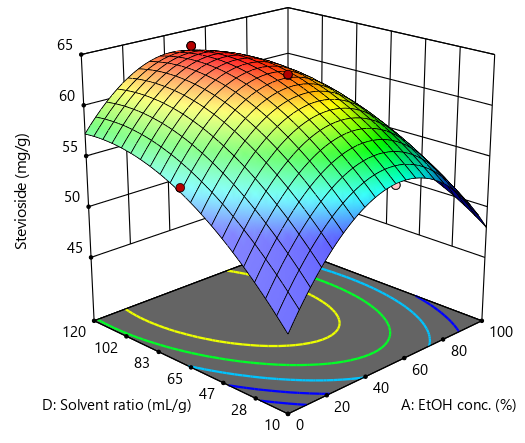 | 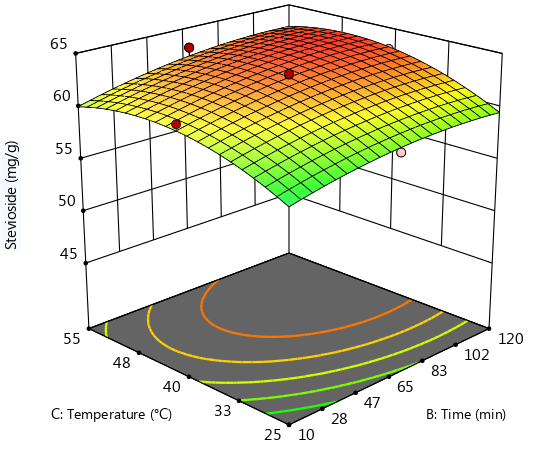 |
| 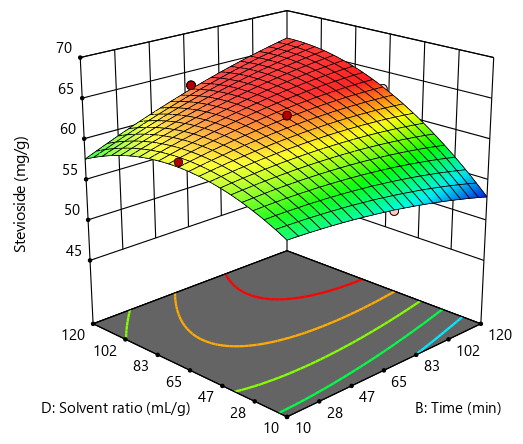 | 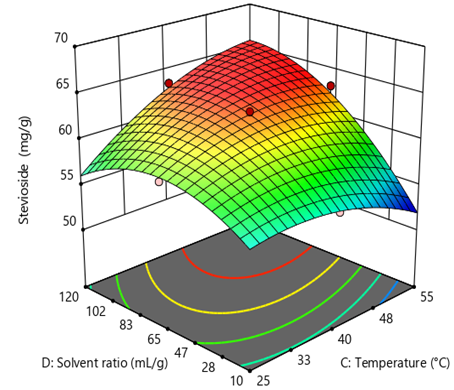 |

**Figure A3** RSMplots of stevioside belonging to maceration (solvent extraction)

| 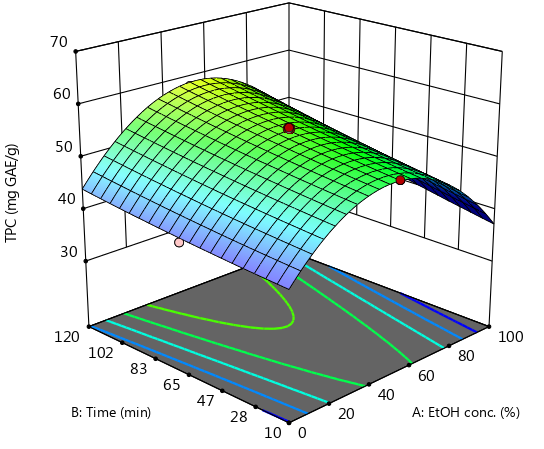 | 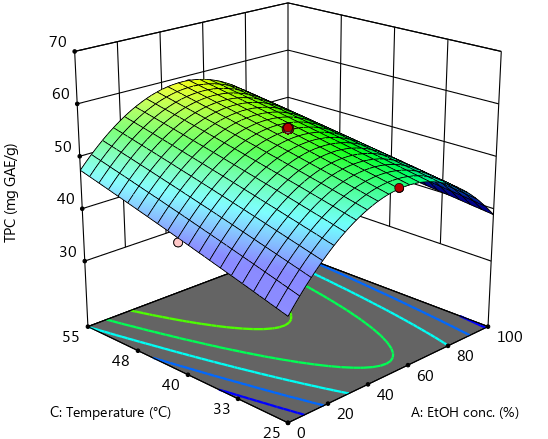 |
| --- | --- |
| 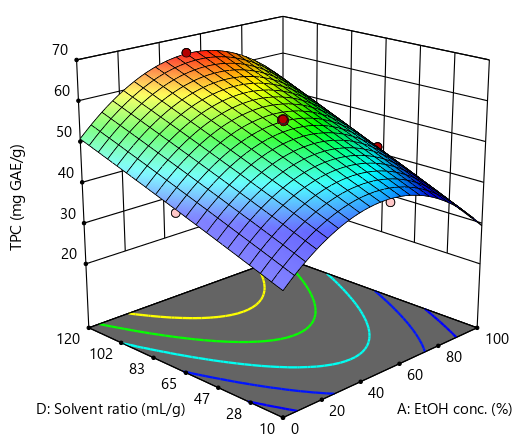 | 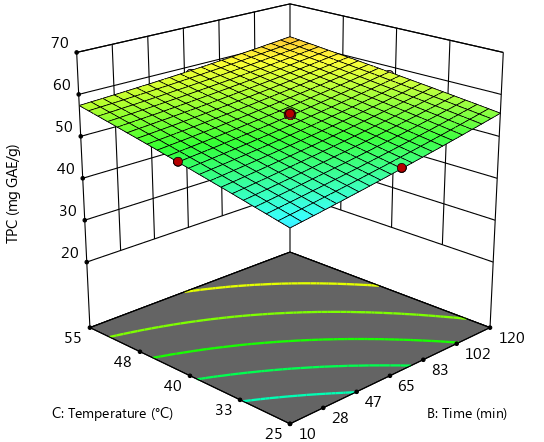 |
| 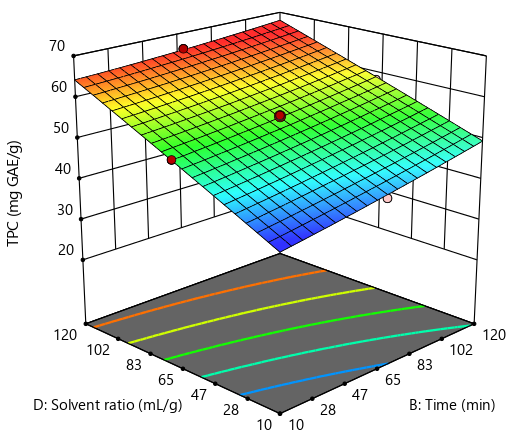 | 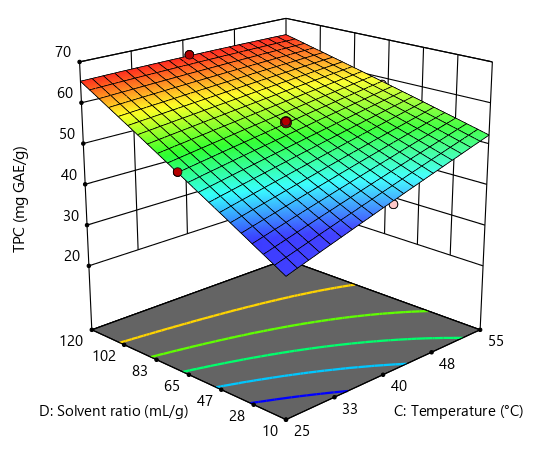 |

**Figure A4** RSMplots of total phenolic compound belonging to maceration (solvent extraction)

| 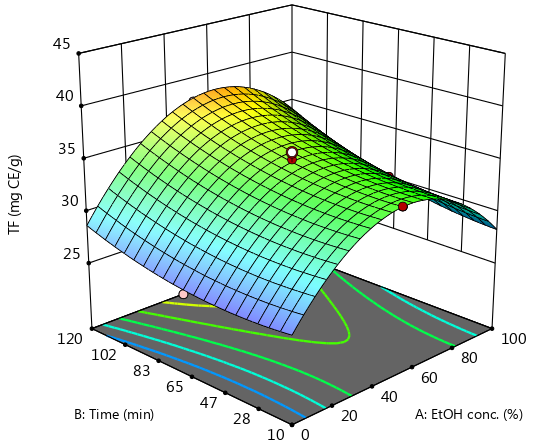 | 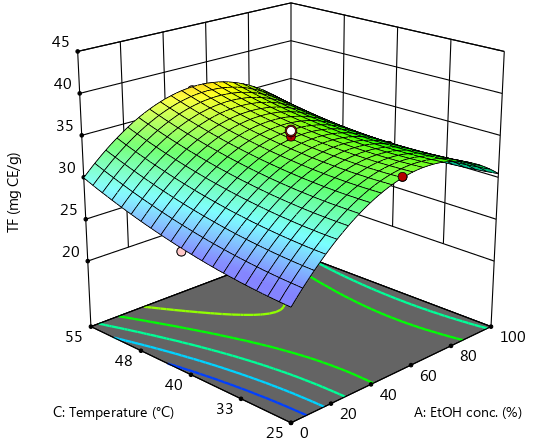 |
| --- | --- |
| 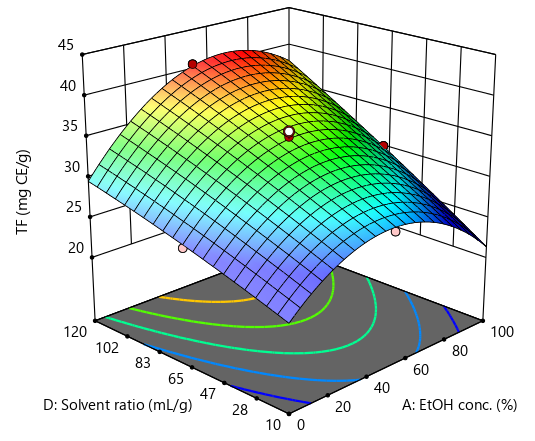 | 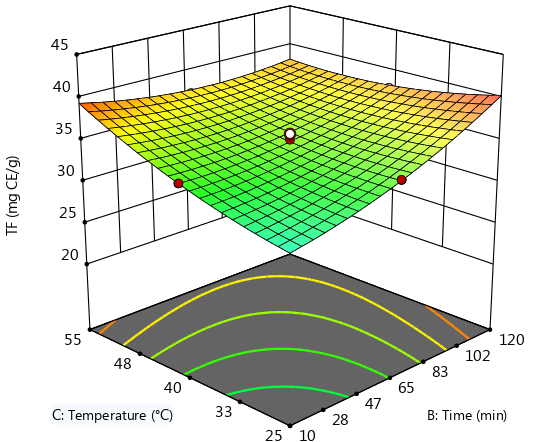 |
| 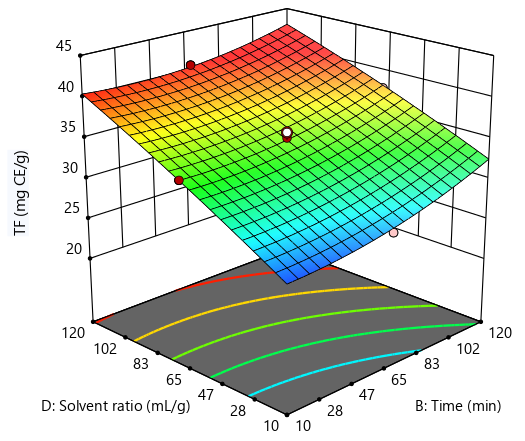 | 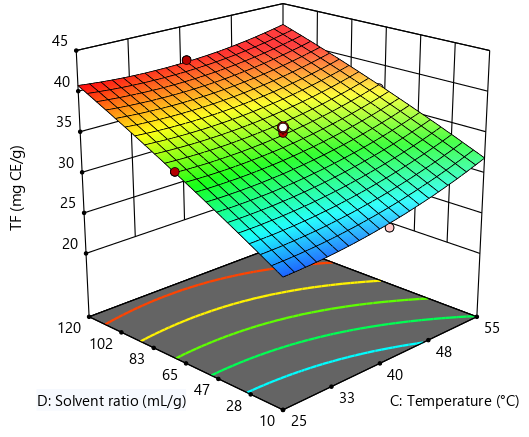 |

**Figure A5** RSMplots of total flavonoid belonging to maceration (solvent extraction)

| 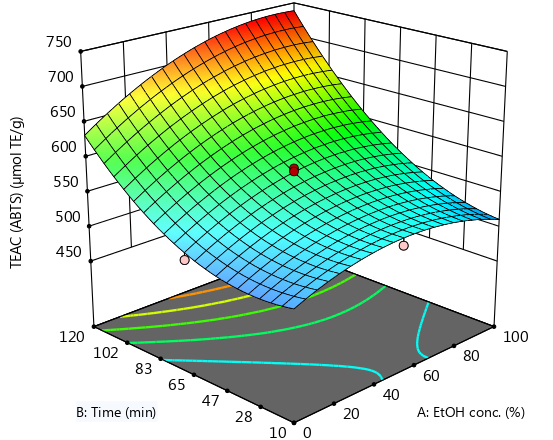 | 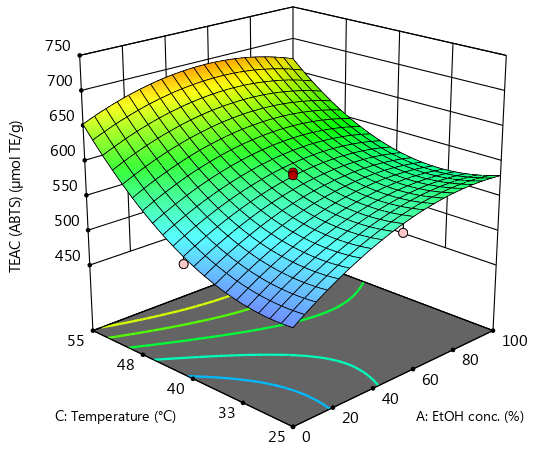 |
| --- | --- |
| 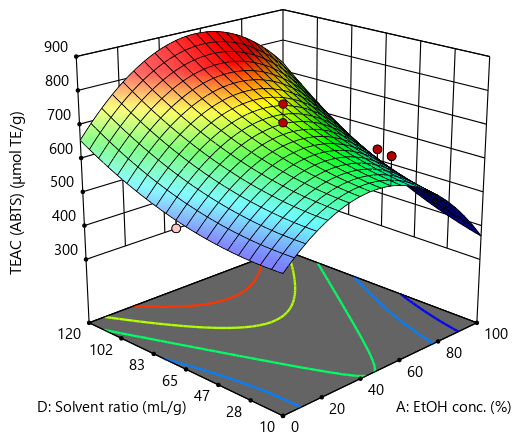 | 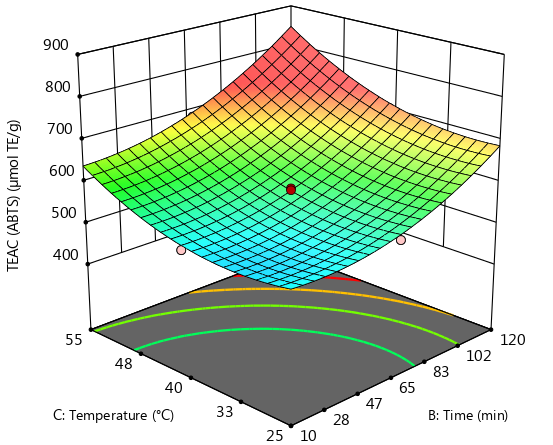 |
| 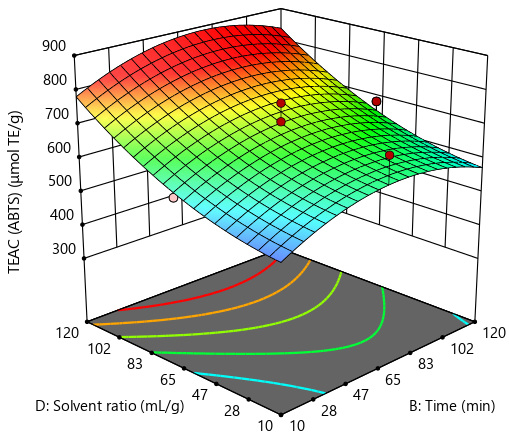 | 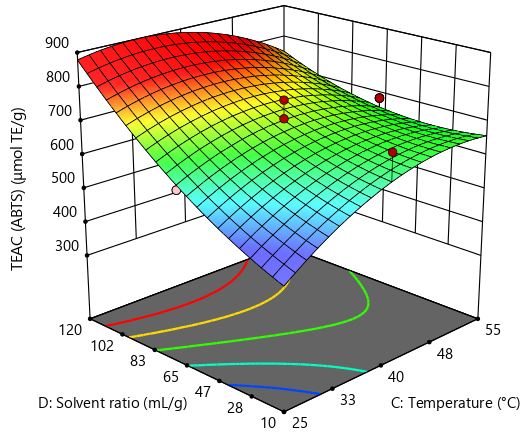 |

**Figure A6** RSMplots of antioxidant capacity (ABTS) belonging to maceration (solvent extraction)

| **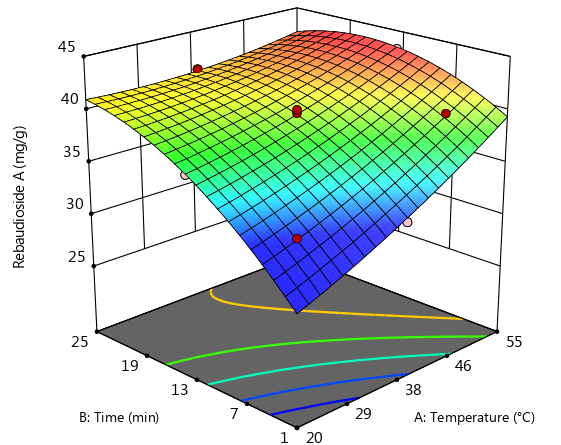** | **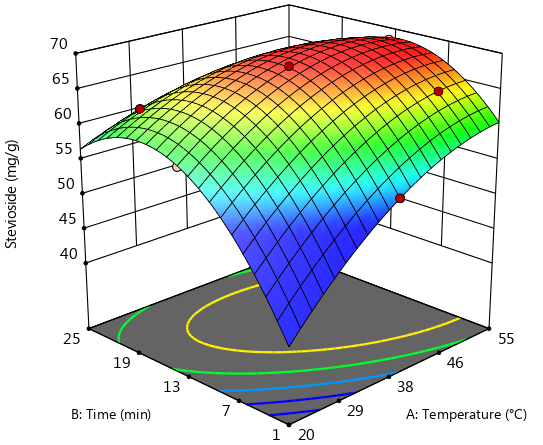** |
| --- | --- |
| **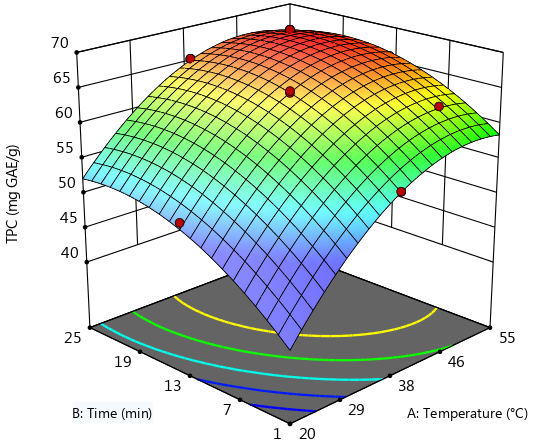** | |
| **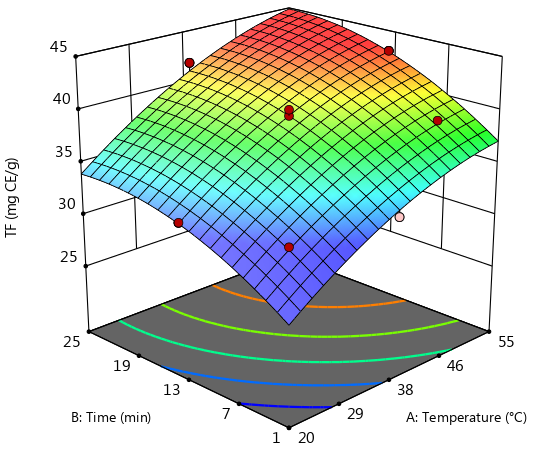** | **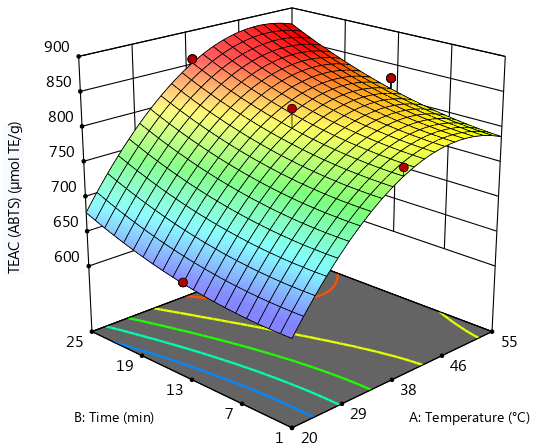** |

**Figure A7** RSM plots of responses belonging to microwave assisted extraction

| 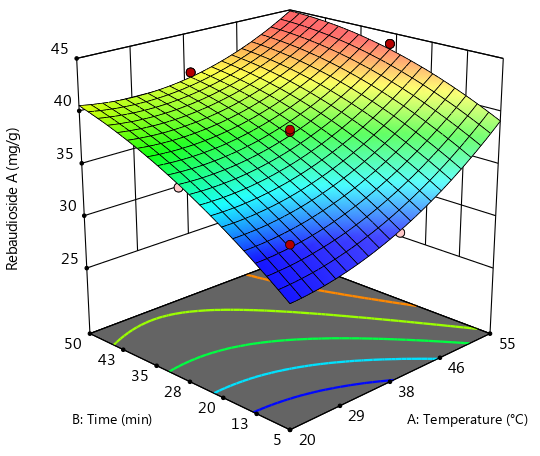 | 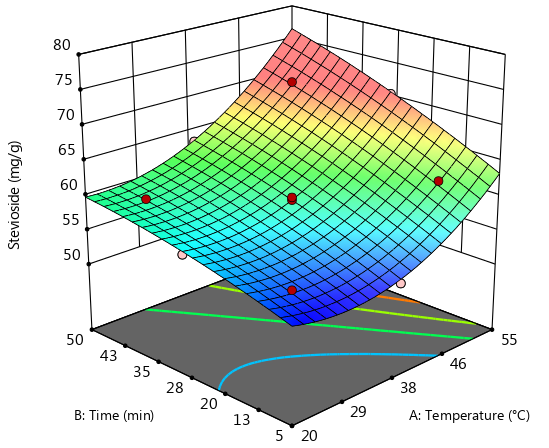 |
| --- | --- |
| 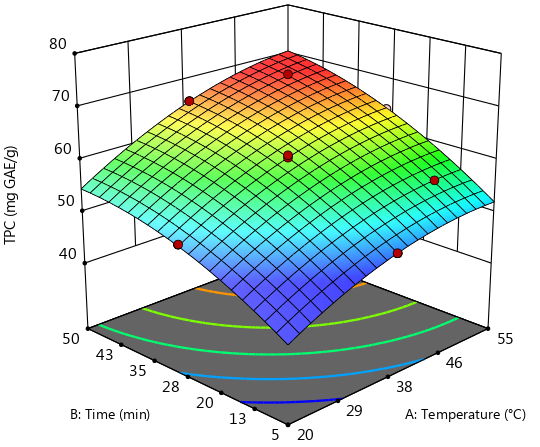 | |
| 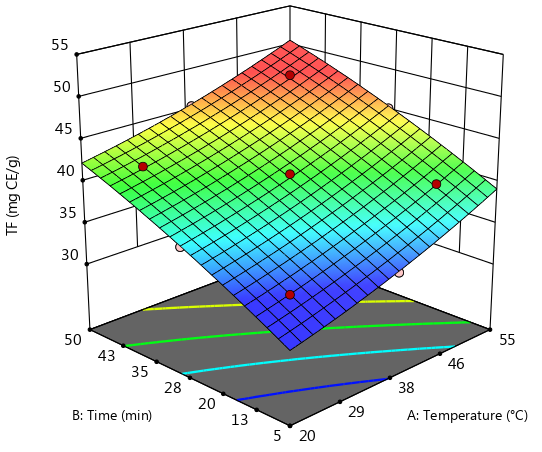 | 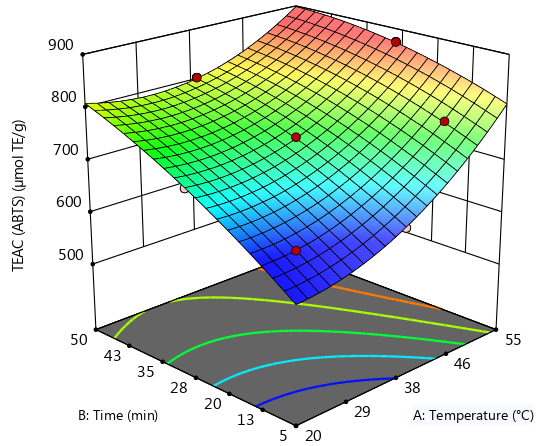 |

**Figure A8** RSM plots of responses belonging to ultrasound assisted extraction
